# Supplementary material
Source: HighWire-hosted journal article supplement (https://embor.embopress.org/content/embr.201846196)
Supplement: inline-supplementary-material-3 [file inline-supplementary-material-3.pdf]

# **Opposing kinesin complexes queue at plus tips to ensure microtubule catastrophe at cell ends**

## **Appendix Contents**

Page 1 - Appendix Table S1. List of strains used in this study

Page 4 - Appendix Table S2. List of oligonucleotides used in this study

**Appendix Table S1. List of strains used in this study**

**Figure 1B**

|        |                                                                                       |            |
|--------|---------------------------------------------------------------------------------------|------------|
| JM8018 | <i>leu1-32::SV40-GFP-atb2:leu1 h<sup>-</sup></i>                                      | F. Chang   |
| JM8427 | <i>klp5::natR klp6::hygR leu1-32::SV40-GFP-atb2:leu1 h<sup>-</sup></i>                | this study |
| JM8334 | <i>mcp1::kanR leu1-32::SV40-GFP-atb2:leu1 h<sup>+</sup></i>                           | this study |
| JM8547 | <i>mcp1::kanR klp5::natR klp6::hygR<br/>leu1-32::SV40-GFP-atb2:leu1 h<sup>?</sup></i> | this study |

**Figure 1C-E**

|        |                                                                                                          |            |
|--------|----------------------------------------------------------------------------------------------------------|------------|
| JM6823 | <i>natR::Z:adh15-mCherry-atb2 h<sup>-</sup></i>                                                          | K. Sawin   |
| JM9441 | <i>klp5-mNeonGreen:kanR klp6-mNeonGreen:hygR<br/>natR::Z:adh15-mCherry-atb2 h<sup>+</sup></i>            | this study |
| JM9877 | <i>mcp1::natR klp5-mNeonGreen:kanR<br/>klp6-mNeonGreen:hygR natR::Z:adh15-mCherry-atb2 h<sup>?</sup></i> | this study |

**Figure 1F**

|        |                                                                                                                  |            |
|--------|------------------------------------------------------------------------------------------------------------------|------------|
| JM9513 | <i>klp5-mNeonGreen:kanR klp6-mNeonGreen:hygR<br/>natR::Z:adh15-mCherry-atb2 cut11-mCherry:ura4 h<sup>?</sup></i> | this study |
| JM9877 | <i>mcp1::natR klp5-mNeonGreen:kanR<br/>klp6-mNeonGreen:hygR natR::Z:adh15-mCherry-atb2 h<sup>?</sup></i>         | this study |

**Figure EV1A**

|        |                                                               |            |
|--------|---------------------------------------------------------------|------------|
| JM7175 | <i>klp5-GFP:kanR natR::Z:adh15-mCherry-atb2 h<sup>-</sup></i> | this study |
| JM7129 | <i>mcp1-GFP:hygR natR::Z:adh15-mCherry-atb2 h<sup>-</sup></i> | this study |

**Figure EV1B**

|        |                                                                                                                                                       |            |
|--------|-------------------------------------------------------------------------------------------------------------------------------------------------------|------------|
| JM2943 | <i>klp5::kanR h<sup>+</sup></i>                                                                                                                       | T. Toda    |
| JM3089 | <i>klp6::ura4 h<sup>-</sup></i>                                                                                                                       | T. Toda    |
| JM7129 | <i>mcp1-GFP:hygR natR::Z:adh15-mCherry-atb2 h<sup>-</sup></i>                                                                                         | this study |
| JM7185 | <i>mcp1-GFP:hygR natR::Z:adh15-mCherry-atb2 klp5::kanR h</i>                                                                                          | this study |
| JM7187 | <i>mcp1-GFP:hygR natR::Z:adh15-mCherry-atb2 klp6::ura4 h</i>                                                                                          | this study |
| JM7208 | <i>mcp1-GFP:hygR natR::Z:adh15-mCherry-atb2 klp5::kanR<br/>klp6::ura4 h</i>                                                                           | this study |
| JM8520 | <i>mcp1-GFP:hygR natR::Z:adh15-mCherry-atb2 klp5::kanR<br/>klp6::ura4 lys1::klp5:kanR his3::klp6:blaR h<sup>-</sup></i>                               | this study |
| JM8521 | <i>mcp1-GFP:hygR natR::Z:adh15-mCherry-atb2 klp5::kanR<br/>klp6::ura4 lys1::kanR his3::blaR h<sup>-</sup></i>                                         | this study |
| JM8583 | <i>mcp1-GFP:hygR natR::Z:adh15-mCherry-atb2 klp5::kanR<br/>klp6::ura4 lys1::klp5(G277A,E299A):kanR<br/>his3::klp6(G296A,E298A):blaR h<sup>-</sup></i> | this study |

**Figure EV1C**

|        |                                                                          |            |
|--------|--------------------------------------------------------------------------|------------|
| JM9325 | <i>mcp1::natR lys1::nmt1-GFP-mcp1:ura4 klp5-13Myc:kanR h<sup>-</sup></i> | this study |
|--------|--------------------------------------------------------------------------|------------|

**Figure EV1D**

|        |                                                                |            |
|--------|----------------------------------------------------------------|------------|
| JM196  | <i>cdc25-22 h<sup>+</sup></i>                                  | lab stock  |
| JM8009 | <i>mcp1::kanR cdc25-22 h<sup>-</sup></i>                       | this study |
| JM5963 | <i>klp5::natR klp6::ura4 cdc25-22 h<sup>?</sup></i>            | lab stock  |
| JM9321 | <i>mcp1::hygR cdc25-22 klp5::natR klp6::ura4 h<sup>-</sup></i> | this study |

**Figure EV1E**

|        |                                                                          |            |
|--------|--------------------------------------------------------------------------|------------|
| JM7175 | <i>klp5-GFP:kanR natR::Z:adh15-mCherry-atb2 h<sup>-</sup></i>            | this study |
| JM7202 | <i>mcp1::hygR klp5-GFP:kanR natR::Z:adh15-mCherry-atb2 h<sup>-</sup></i> | this study |
| JM7177 | <i>klp6-GFP:hygR natR::Z:adh15-mCherry-atb2 h<sup>-</sup></i>            | this study |
| JM7205 | <i>mcp1::kanR klp6-GFP:hygR natR::Z:adh15-mCherry-atb2 h<sup>-</sup></i> | this study |

**Figure EV2A**

|                    |                                                                                                             |               |
|--------------------|-------------------------------------------------------------------------------------------------------------|---------------|
| JM3707             | <i>fta3-GFP:kanR h<sup>-</sup></i>                                                                          | X. He         |
| JM3725             | <i>sid4-TdTomato:hygR h<sup>+</sup></i>                                                                     | I. Hagan      |
| JM5061             | <i>fta3-GFP:kanR sid4-tdTomato:hygR h<sup>-</sup></i>                                                       | lab stock     |
| JM6143             | <i>klp5::ura4 fta3-GFP:kanR sid4-tdTomato:hygR h<sup>?</sup></i>                                            | lab stock     |
| JM7141             | <i>mcp1::natR fta3-GFP:kanR sid4-tdTomato:hygR h<sup>-</sup></i>                                            | this study    |
| <b>Figure EV2B</b> |                                                                                                             |               |
| JM2589             | <i>cdc13-117:cdc13-GFP:LEU2 h<sup>-</sup></i>                                                               | M. Yanagida   |
| JM5785             | <i>cdc13-117:cdc13-GFP:LEU2 sid4-TdTomato:hygR h<sup>-</sup></i>                                            | this study    |
| JM9138             | <i>klp5::ura4 cdc13-117:cdc13-GFP:LEU2 sid4-TdTomato:hygR h<sup>+</sup></i>                                 | this study    |
| JM9131             | <i>mcp1::natR cdc13-117:cdc13-GFP:LEU2 sid4-TdTomato:hygR h<sup>-</sup></i>                                 | this study    |
| <b>Figure EV2C</b> |                                                                                                             |               |
| JM2794             | <i>ade6-M210 + Ch16(ade6-M216) h<sup>-</sup></i>                                                            | J-P. Javerzat |
| JM6343             | <i>klp6::ura4 ade6-M210 + Ch16(ade6-M216) h<sup>?</sup></i>                                                 | this study    |
| JM7181             | <i>mcp1::natR ade6-M210 + Ch16(ade6-M216) h<sup>-</sup></i>                                                 | this study    |
| <b>Figure EV2D</b> |                                                                                                             |               |
| JM2881             | <i>dam1::kanR h<sup>+</sup></i>                                                                             | lab stock     |
| PR100              | <i>h<sup>+</sup></i>                                                                                        | P. Russell    |
| JM2943             | <i>klp5::kanR h<sup>+</sup></i>                                                                             | lab stock     |
| JM7111             | <i>mcp1::kanR h<sup>-</sup></i>                                                                             | this study    |
| <b>Figure EV2E</b> |                                                                                                             |               |
| JM3253             | <i>klp5::kanR h<sup>-</sup></i>                                                                             | lab stock     |
| JM2958             | <i>dam1:hygR h<sup>+</sup></i>                                                                              | lab stock     |
| JM2115             | <i>dis2::ura4 h<sup>+</sup></i>                                                                             | M. Yanagida   |
| JM8832             | <i>bub3::hygR h<sup>+</sup></i>                                                                             | lab stock     |
| JM6523             | <i>mcp1::natR h<sup>-</sup></i>                                                                             | this study    |
| <b>Figure EV2F</b> |                                                                                                             |               |
| JM9441             | <i>klp5-mNeonGreen:kanR klp6-mNeonGreen:hygR natR:Z:adh15-mCherry-atb2 h<sup>+</sup></i>                    | this study    |
| JM9877             | <i>mcp1::natR klp5-mNeonGreen:kanR klp6-mNeonGreen:hygR natR:Z:adh15-mCherry-atb2 h<sup>?</sup></i>         | this study    |
| <b>Figure EV2G</b> |                                                                                                             |               |
| JM7129             | <i>mcp1-GFP:hygR natR:Z:adh15-mCherry-atb2 h<sup>-</sup></i>                                                | this study    |
| <b>Figure 2A</b>   |                                                                                                             |               |
| JM9513             | <i>klp5-mNeonGreen:kanR klp6-mNeonGreen:hygR natR:Z:adh15-mCherry-atb2 cut11-mCherry:ura4 h<sup>?</sup></i> | this study    |
| JM3010             | <i>tea2-GFP:kanR h<sup>-</sup></i>                                                                          | P. Nurse      |
| JM8007             | <i>tea2-GFP:kanR natR:Z:adh15-mCherry-atb2 h<sup>-</sup></i>                                                | this study    |
| <b>Figure 2B-C</b> |                                                                                                             |               |
| JM8007             | <i>tea2-GFP:kanR natR:Z:adh15-mCherry-atb2 h<sup>-</sup></i>                                                | this study    |
| JM8070             | <i>klp6::hygR tea2-GFP:kanR natR:Z:adh15-mCherry-atb2 h<sup>?</sup></i>                                     | this study    |
| JM8053             | <i>mcp1::hygR tea2-GFP:kanR natR:Z:adh15-mCherry-atb2 h<sup>?</sup></i>                                     | this study    |
| <b>Figure 2D</b>   |                                                                                                             |               |
| JM9441             | <i>klp5-mNeonGreen:kanR klp6-mNeonGreen:hygR natR:Z:adh15-mCherry-atb2 h<sup>+</sup></i>                    | this study    |
| JM2895             | <i>tea2::his3 his3-D1 h<sup>-</sup></i>                                                                     | P. Nurse      |
| JM9961             | <i>tea2::his3 klp5-mNeonGreen:kanR klp6-mNeonGreen:hygR natR:Z:adh15-mCherry-atb2 his3-D1 h<sup>?</sup></i> | this study    |
| <b>Figure 2E-F</b> |                                                                                                             |               |

|                      |                                                                                                                         |            |
|----------------------|-------------------------------------------------------------------------------------------------------------------------|------------|
| JM8018               | <i>leu1-32::SV40-GFP-atb2:leu1 h<sup>-</sup></i>                                                                        | F. Chang   |
| JM8427               | <i>klp5::natR klp6::hygR leu1-32::SV40-GFP-atb2:leu1 h<sup>-</sup></i>                                                  | this study |
| JM8334               | <i>mcp1::kanR leu1-32::SV40-GFP-atb2:leu1 h<sup>+</sup></i>                                                             | this study |
| JM8952               | <i>tea2::his3 leu1-32::SV40-GFP-atb2:leu1 his3-D1 h<sup>+</sup></i>                                                     | this study |
| JM9439               | <i>tea2::his3 klp5::natR klp6::hygR leu1-32::SV40-GFP-atb2:leu1 his3-D1 h<sup>?</sup></i>                               | this study |
| JM9202               | <i>tea2::his3 mcp1::hygR leu1-32::SV40-GFP-atb2:leu1 his3-D1 h<sup>+</sup></i>                                          | this study |
| <b>Figure EV3A</b>   |                                                                                                                         |            |
| JM9993               | <i>tea2-GFP:kanR natR::Z:adh15-mCherry-atb2 cut11-mCherry:ura4 h<sup>?</sup></i>                                        | this study |
| JM8070               | <i>klp6::hygR tea2-GFP:kanR natR::Z:adh15-mCherry-atb2 h<sup>?</sup></i>                                                | this study |
| JM8053               | <i>mcp1::hygR tea2-GFP:kanR natR::Z:adh15-mCherry-atb2 h<sup>?</sup></i>                                                | this study |
| <b>Figure EV3B</b>   |                                                                                                                         |            |
| JM8018               | <i>leu1-32::SV40-GFP-atb2:leu1 h<sup>-</sup></i>                                                                        | F. Chang   |
| JM8334               | <i>mcp1::kanR leu1-32::SV40-GFP-atb2:leu1 h<sup>+</sup></i>                                                             | this study |
| JM2893               | <i>tip1::kanR h<sup>-</sup></i>                                                                                         | P. Nurse   |
| JM8392               | <i>tip1::kanR leu1-32::SV40-GFP-atb2:leu1 h<sup>-</sup></i>                                                             | this study |
| JM8462               | <i>mcp1::hygR tip1::kanR leu1-32::SV40-GFP-atb2:leu1 h<sup>?</sup></i>                                                  | this study |
| JM2894               | <i>tea1::ura4 h<sup>-</sup></i>                                                                                         | P. Nurse   |
| JM8929               | <i>tea1::ura4 leu1-32::SV40-GFP-atb2:leu1 h<sup>+</sup></i>                                                             | this study |
| JM8944               | <i>mcp1::hygR tea1::ura4 leu1-32::SV40-GFP-atb2:leu1 h<sup>+</sup></i>                                                  | this study |
| <b>Figure EV3C-D</b> |                                                                                                                         |            |
| JM9513               | <i>klp5-mNeonGreen:kanR klp6-mNeonGreen:hygR natR::Z:adh15-mCherry-atb2 cut11-mCherry:ura4 h<sup>?</sup></i>            | this study |
| JM9961               | <i>tea2::his3 klp5-mNeonGreen:kanR klp6-mNeonGreen:hygR natR::Z:adh15-mCherry-atb2 his3-D1 h<sup>?</sup></i>            | this study |
| <b>Figure EV3E</b>   |                                                                                                                         |            |
| JM9513               | <i>klp5-mNeonGreen:kanR klp6-mNeonGreen:hygR natR::Z:adh15-mCherry-atb2 cut11-mCherry:ura4 h<sup>?</sup></i>            | this study |
| JM10020              | <i>mcp1::natR tea2::his3 klp5-mNeonGreen:kanR klp6-mNeonGreen:hygR natR::Z:adh15-mCherry-atb2 his3-D1 h<sup>?</sup></i> | this study |
| <b>Figure 3A-B</b>   |                                                                                                                         |            |
| JM9991               | <i>tea2-GFP:kanR tip1-TdTomato:hygR h<sup>?</sup></i>                                                                   | this study |
| <b>Figure 4A-B</b>   |                                                                                                                         |            |
| JM9935               | <i>klp5-mNeonGreen:kanR klp6-mNeonGreen:hygR tip1-TdTomato:hygR h<sup>?</sup></i>                                       | this study |
| <b>Figure 4C</b>     |                                                                                                                         |            |
| JM10018              | <i>mcp1::natR klp5-mNeonGreen:kanR klp6-mNeonGreen:hygR tip1-TdTomato:hygR h<sup>?</sup></i>                            | this study |
| <b>Figure EV4</b>    |                                                                                                                         |            |
| JM9935               | <i>klp5-mNeonGreen:kanR klp6-mNeonGreen:hygR tip1-TdTomato:hygR h<sup>?</sup></i>                                       | this study |
| <b>Figure EV5</b>    |                                                                                                                         |            |
| JM10018              | <i>mcp1::natR klp5-mNeonGreen:kanR klp6-mNeonGreen:hygR tip1-TdTomato:hygR h<sup>?</sup></i>                            | this study |

All strains are *ura4-D18 leu1-32* unless otherwise stated.

**Appendix Table S2. List of oligonucleotides used in this study**

|                       |                                                                                    |
|-----------------------|------------------------------------------------------------------------------------|
| <i>Klp5.tagW</i>      | CCTCATCTGGACACTATTGATCTGGAT                                                        |
| <i>Klp5.tagX</i>      | GGGGATCCGTCGACCTGCAGCGTACGAGGTGGCTTTCTC<br>TTCTTCGTT                               |
| <i>Klp5.tagY</i>      | GTTTAAACGAGCTCGAATTCATCGATCGGATAAGCTTGAT<br>GATATGA                                |
| <i>Klp5.tagZ</i>      | GGTGGCAGACATATATGTACGCTT                                                           |
| <i>Klp6.tagW</i>      | GTGGAAAAATCTTTAGATAAACATAAT                                                        |
| <i>Klp6.tagX</i>      | GGGGATCCGTCGACCTGCAGCGTACGAAGCATTAGGAGT<br>ATTCTCAGTCCCGCC                         |
| <i>Klp6.tagY</i>      | GTTTAAACGAGCTCGAATTCATCGATGCTACTTATGCTACT<br>TATGATTTAGCATTTCAT                    |
| <i>Klp6.tagZ</i>      | GGTCAATCATTAAACCCGATTAAT                                                           |
| <i>Mcp1.delW</i>      | AGCATTTTTTAACTATAATAAGC                                                            |
| <i>Mcp1.delX</i>      | GGGGATCCGTCGACCTGCAGCGTACGAAATATCTTATGAT<br>TTTAAACATTA AAAACAG                    |
| <i>Mcp1.delY</i>      | GTTTAAACGAGCTCGAATTCATCGATTTTGTCTCTCGTTAC<br>TCTACAATATTT                          |
| <i>Mcp1.delZ</i>      | GGCTTAACGAATTCCTTGGATACCA                                                          |
| <i>Mcp1.tagW</i>      | CCCAAAGGTGAATTTACTAATTCCTT                                                         |
| <i>Mcp1.tagX</i>      | GGGGATCCGTCGACCTGCAGCGTACGATAGAAAAGTAGG<br>TAGTTTAGAACCGGGGATCCGTCGACCTGCAGCGTACGA |
| <i>Mcp1.tagY</i>      | GTTTAAACGAGCTCGAATTCATCGATATTAATGTATGAATA<br>TAATGAAATAATTCGTAA                    |
| <i>Mcp1.tagZ</i>      | CAATTTTCTTTGGTGTCTGACAAAGCGT                                                       |
| <i>Mcp1.pLys1U.FW</i> | AGTAGTCGACGTCCTCTTTTTTTTAAACGGGA                                                   |
| <i>Mcp1.pLys1U.RV</i> | TCATGGATCCCAAAGCACTTAAAATTA AAAAAA                                                 |
